# Supplementary material for: Partial Alleviation of Homologous Superinfection Exclusion of SeMNPV Latently Infected Cells by G1 Phase Infection and G2/M Phase Arrest
Source: MDPI journal article supplement (doi:10.3390/v16050736), 2024-05-06
Supplement: s1 [file s1]

# Supplementary Material

**Supplementary** Table S1. Primer sequences were used in this study.

| Gene            | Forward primer (5' → 3') | Reverse primer (5' → 3') |
|-----------------|--------------------------|--------------------------|
| <i>MCM4</i>     | CGAAGGCGGGTATCATCTGT     | ATACCTCGTCTTGTGGGTCC     |
| <i>PCNA</i>     | AGGAGGAGGAGGCTGTTGTT     | TGCGGTACTCAACCACAAGT     |
| <i>BAF</i>      | CGTCGGTGAGGTATTGGGAA     | TGTCCTTCAGCCATTCTTGGA    |
| <i>Se67</i>     | CCGAGACCCATTTGAACGGT     | GCAGTCGGTCGTTTGTCTGA     |
| <i>Cyclin B</i> | AAGGTTTGACTGTGCGTGGA     | GCCCGATTAGTGTCGCCTT      |
| <i>CDK1</i>     | GCCAGACTACAAGCCCACAT     | TCACATCGCGGAAGTATCGG     |

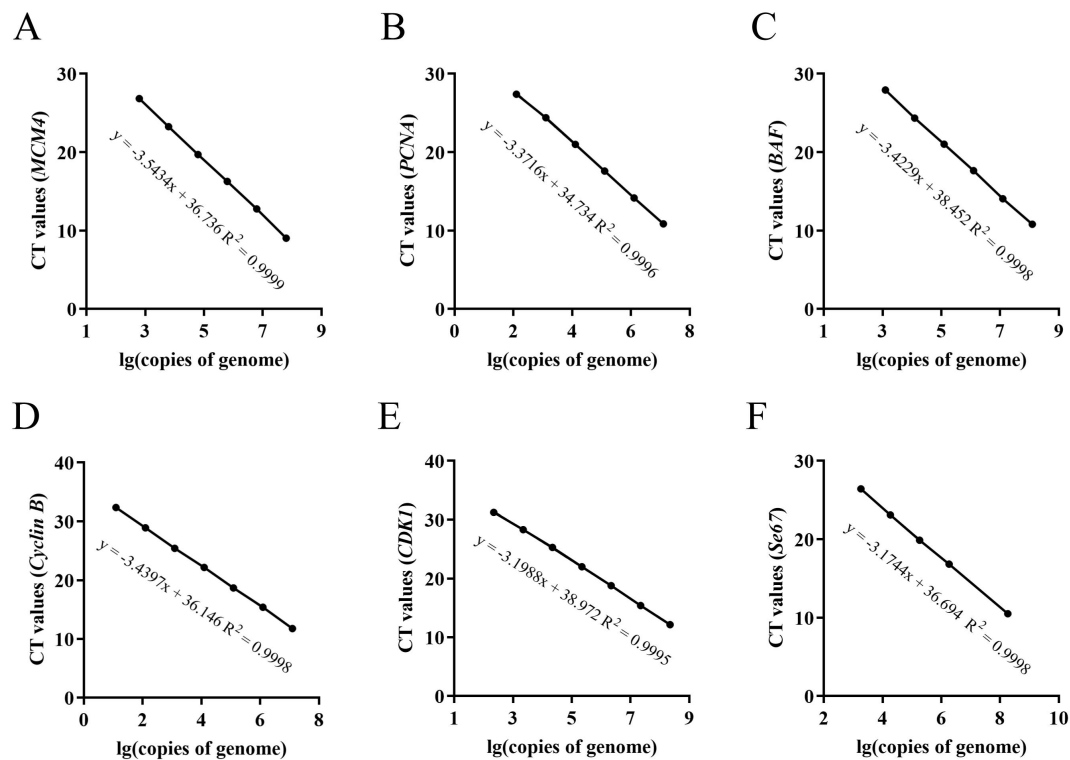

Figure S1. Standard curve of genes copy number. The target gene fragments were cloned into the pMD18-T vector and then transformed into *E. coli* DH5 $\alpha$ , and the plasmid DNA was extracted. Plasmid DNA with a serial gradient dilution of 10 was used as a template for qRT-PCR analysis. Standard curves were prepared based on Ct values and common logarithmic values (lg values) of genes *MNM4* (A), *PCNA* (B), *BAF* (C), *Cyclin B* (D), *CDK1* (E) and *Se67* (F) copies.

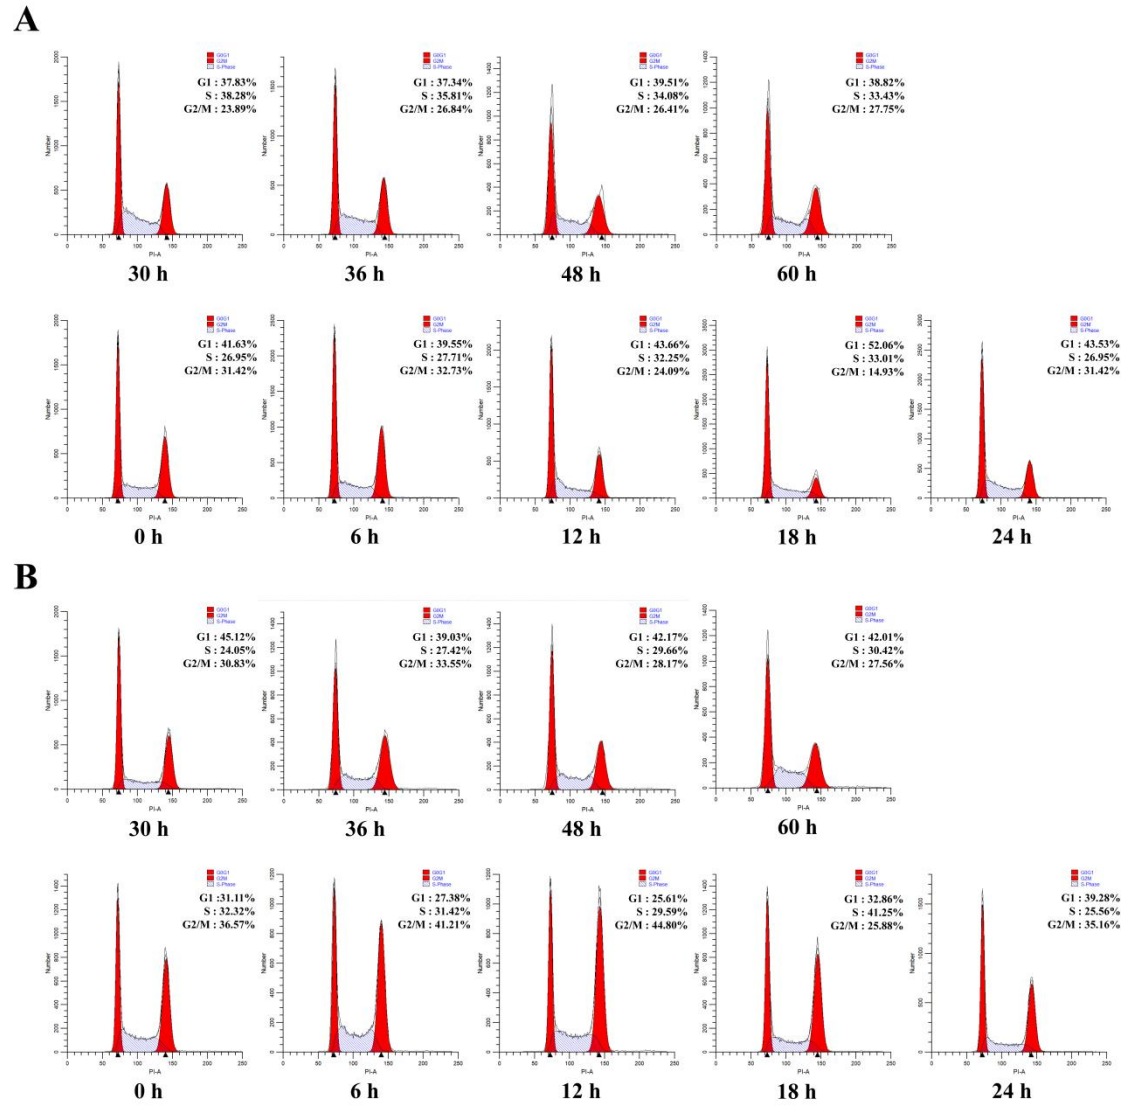

Figure S2. Cell cycle distribution of Se301 and P8-Se301-C1 cells. Cell cycle distribution of Se301 cells (A) and P8-Se301-C1 cells (B) at indicated time points after subculture. The cells ( $1 \times 10^6$ ) were seeded in 60-mm-diameter dishes and then harvested at the indicated time points. After being stained with PI, the distribution of the cells in the G1, S, and G2/M phases was determined by flow cytometry.

**A**

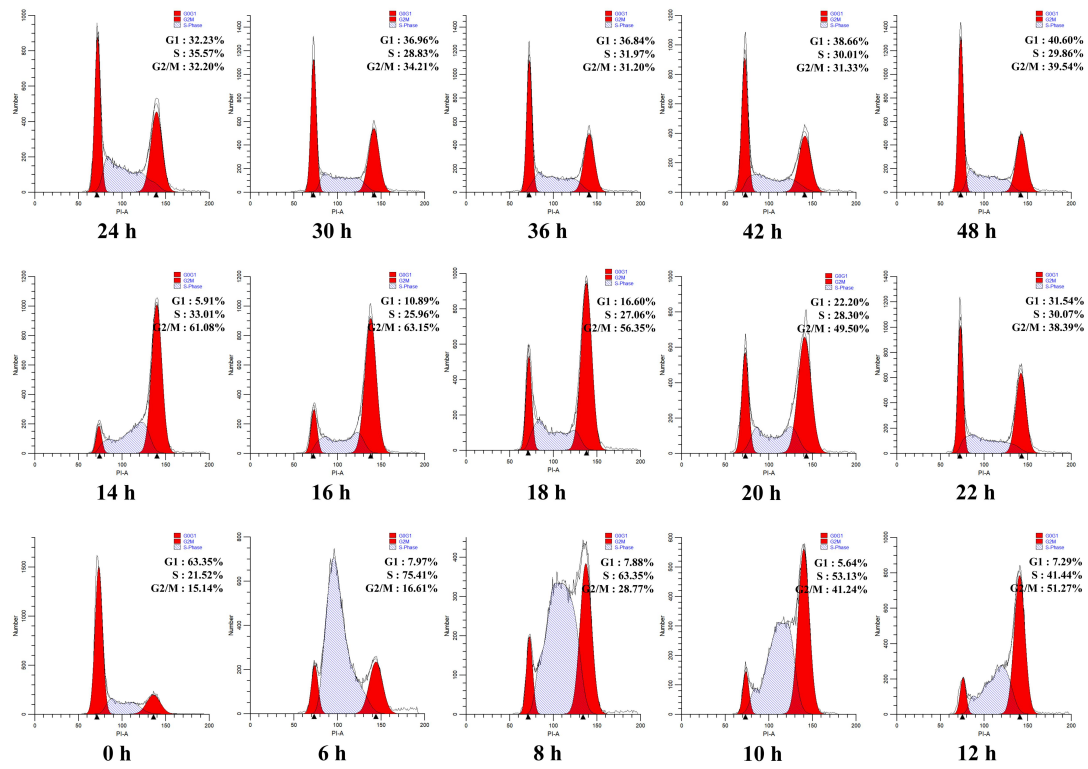

**B**

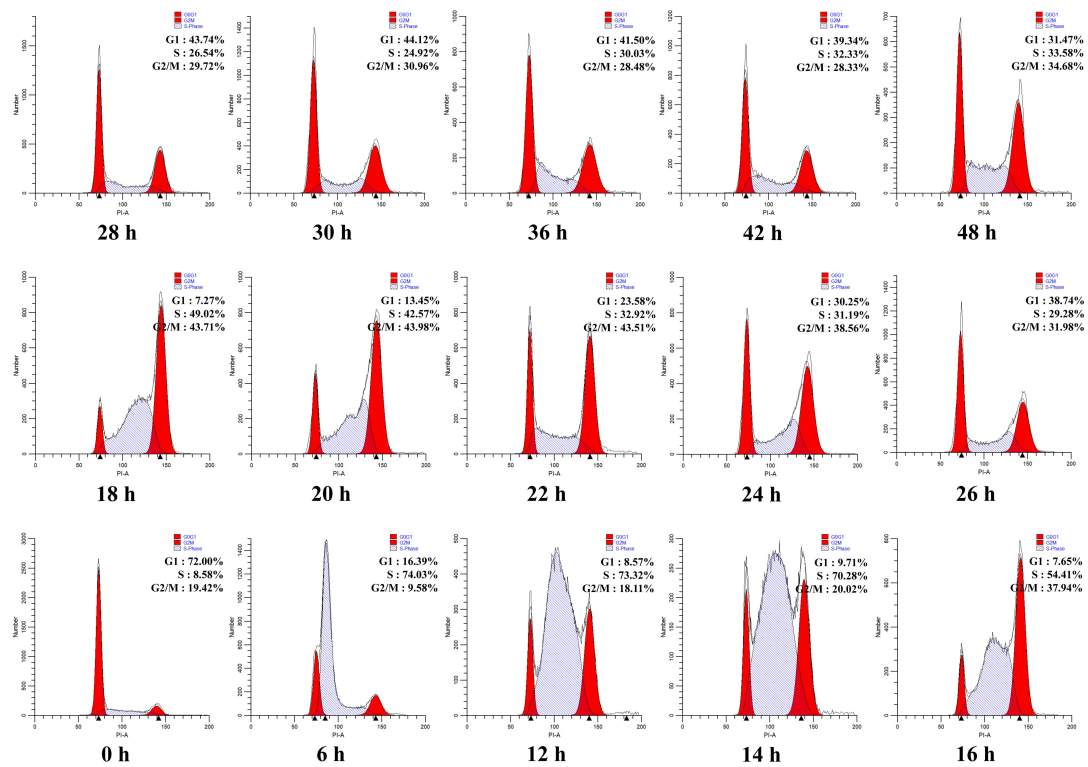

Figure S3. Cell cycle progression of Se301 and P8-Se301-C1 cells. The cells ( $1 \times 10^6$ ) were treated with 80  $\mu\text{g/mL}$  hydroxyurea for 20 h to synchronize in the G1 phase, then fresh medium cultured cells to determine the cell cycle distribution of Se301 cells (A) and P8-Se301-C1 cells (B) at the indicated time points after release culture.

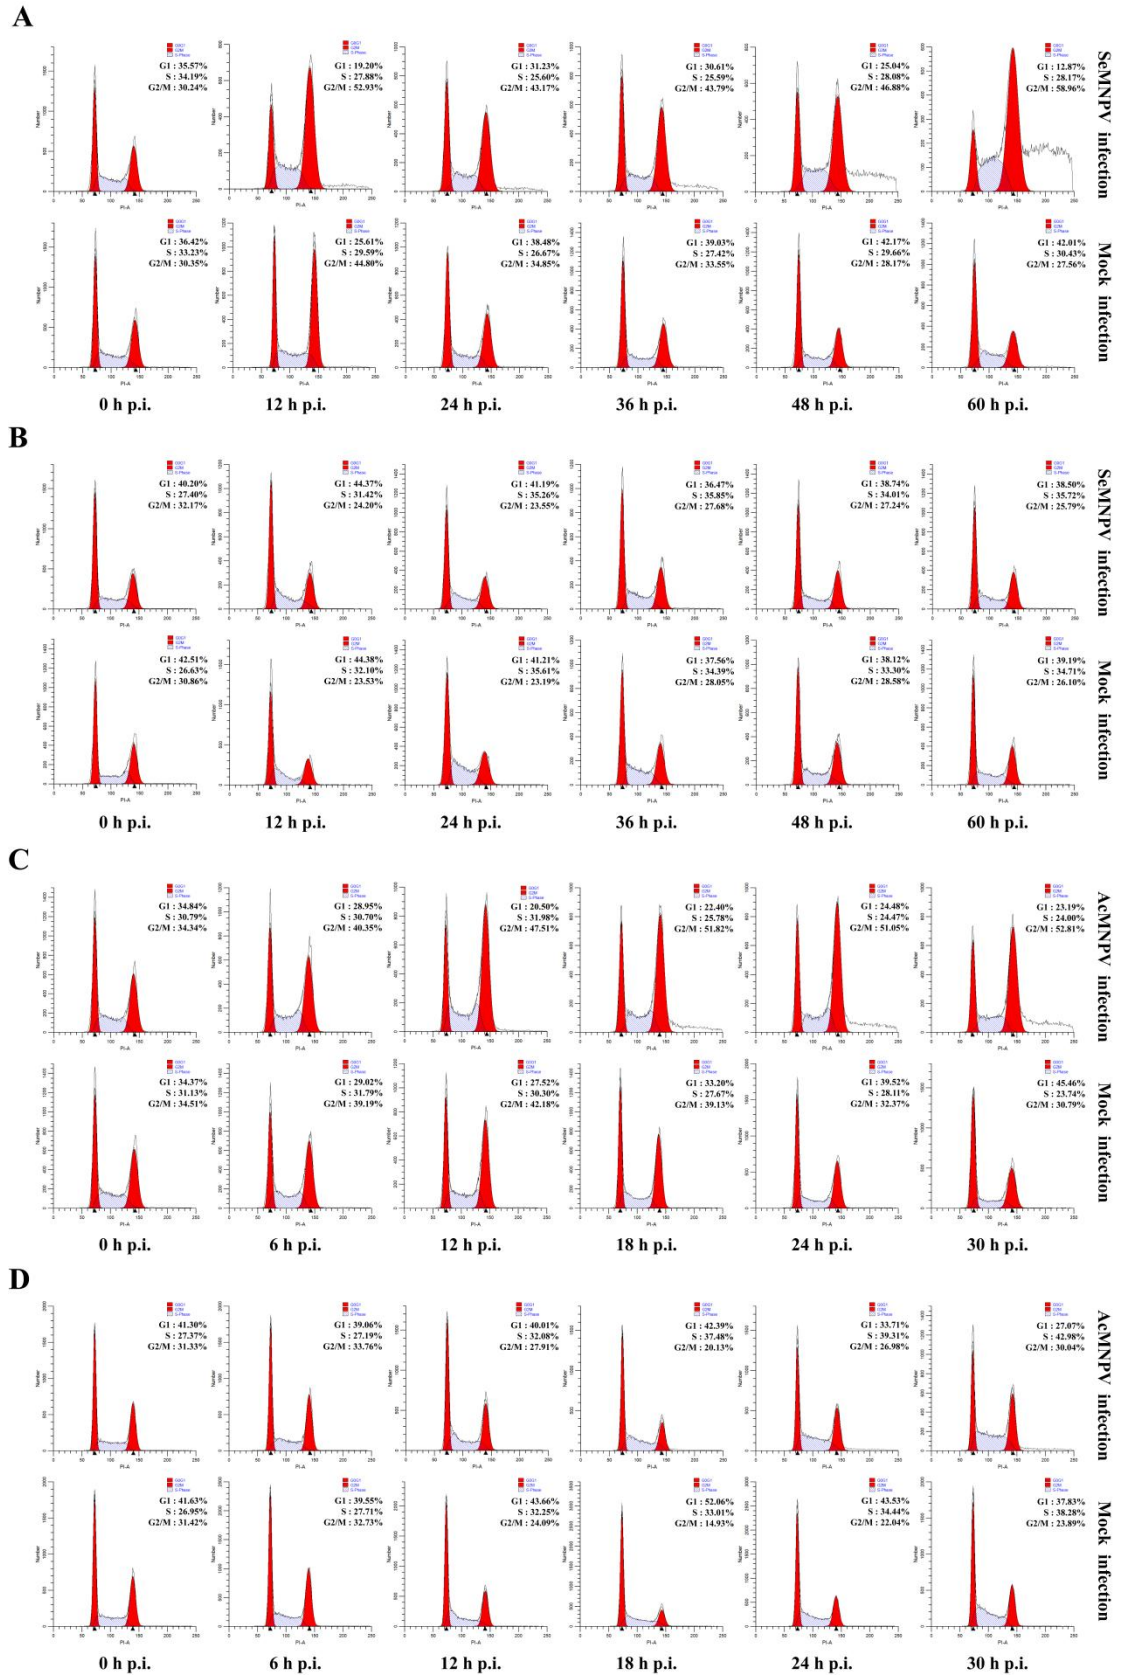

Figure S4. Cell cycle analysis of Se301 and P8-Se301-C1 cells infected by the homologous virus SeMNPV and the heterologous virus AcMNPV. SeMNPV infected Se301 cells (A), SeMNPV infected P8-Se301-C1 cells (B), vAc<sup>PH-GFP</sup> infected Se301 cells (C), vAcPH-GFP infected P8-Se301-C1 cells (D). Cells were

infected with SeMNPV at an MOI of 1 or vAc<sup>PH-GFP</sup> at an MOI of 10. Mock infections were performed by replacing the viral supernatant with the medium.

**A**

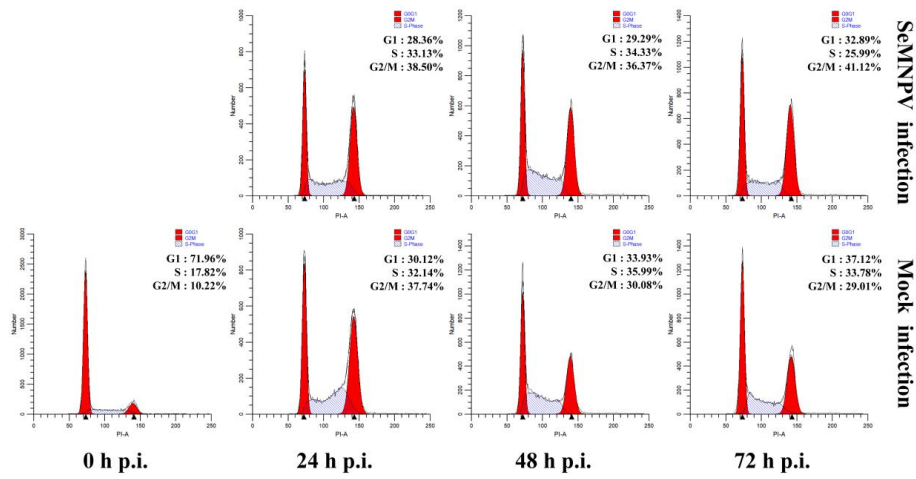

**B**

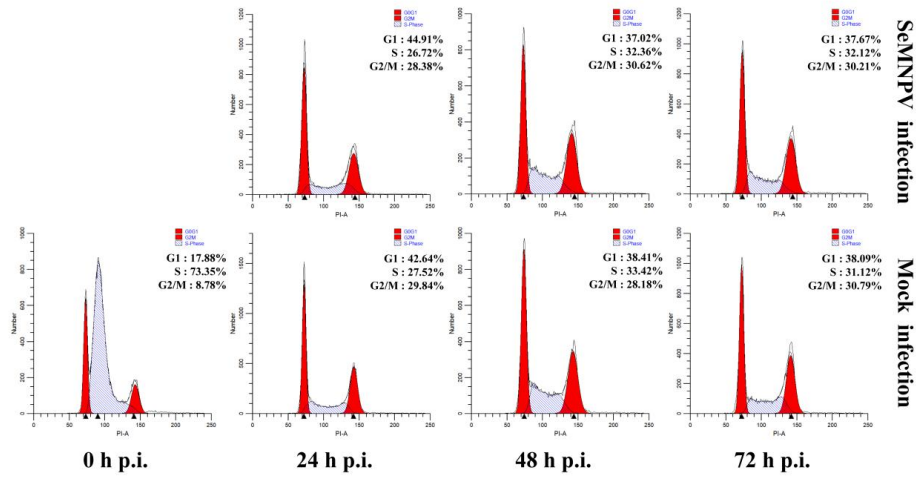

**C**

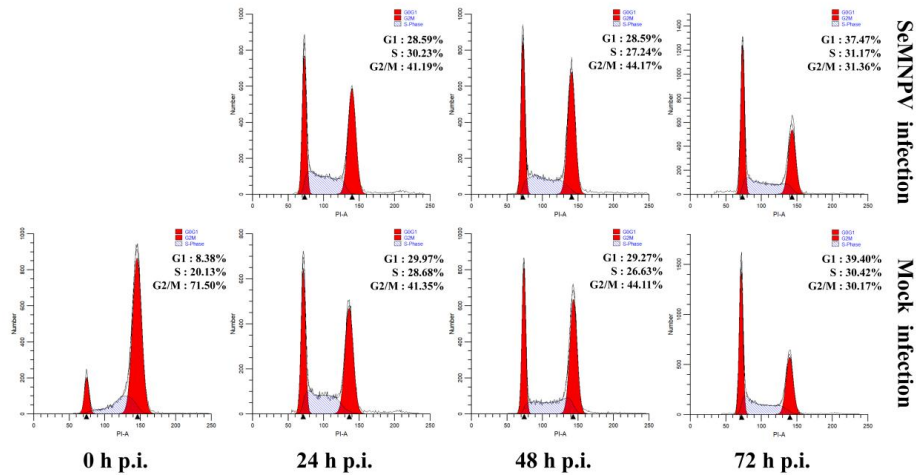

Figure S5. Cell cycle analysis of SeMNPV superinfected of synchronized P8-Se301-C1 cells. Cell cycle distribution of P8-Se301-C1 cells synchronized to G1 (A), S (B) and G2/M (C) phases, respectively, by SeMNPV superinfection. Cells were infected with SeMNPV at an MOI of 1. Mock infections were performed by replacing the viral supernatant with the medium.
